# Supplementary material for: Granulocytic Myeloid-Derived Suppressor Cell Exosomal Prostaglandin E2 Ameliorates Collagen-Induced Arthritis by Enhancing IL-10+ B Cells
Source: PubMed Central journal article supplement (PMC7734343; doi:10.3389/fimmu.2020.588500), 2020-11-30
Supplement: DataSheet_1.pdf [file DataSheet_1.pdf]

## Supplemental Figure

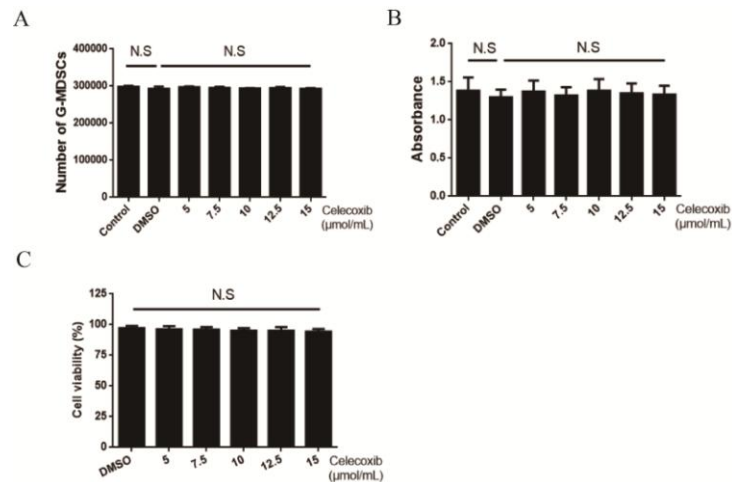

**Figure S1. The effect of celecoxib on number and cell viability of G-MDSCs.**

$3 \times 10^5$  G-MDSCs were inoculated into 96 well plates. Then, different concentrations of celecoxib were added into plates. After 12h, each well was added into equivalent CCK8. After 4 hours of incubation, the absorbance of each well was measured at 450nm. **(A)** The effect of celecoxib on number of G-MDSCs in each group. **(B)** The absorbance in each group. **(C)** The cell viability of G-MDSCs treated with different concentrations of celecoxib were analysed. ns: no significance.

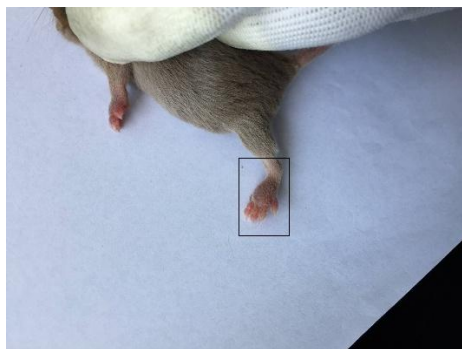

**Figure S2. The original image of CIA group mice.**

The hind foot of the mouse was circled in the box. After rotation, picture on the bottom left in Figure 2D could be acquired.

## B10 cell

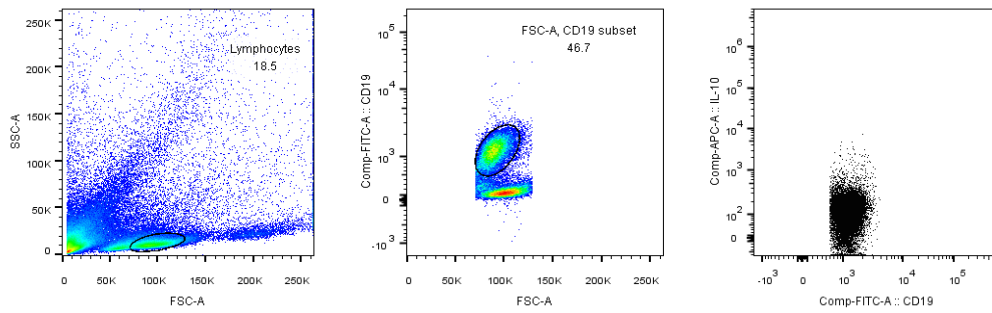

Lymphocytes were firstly gated. Then, CD19<sup>+</sup>B cells were gated on lymphocytes. Finally, IL-10<sup>+</sup>CD19<sup>+</sup>B cells were gated on CD19<sup>+</sup>B cells.

## Plasma cell

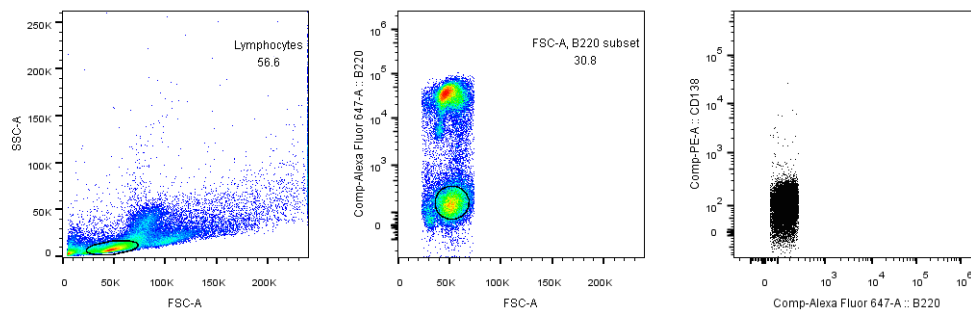

Lymphocytes were firstly gated. Then, B220<sup>+</sup> cells were gated on Lymphocytes. Finally, B220<sup>+</sup>CD138<sup>+</sup> cells were gated on B220<sup>+</sup> cells.

## Tfh cell

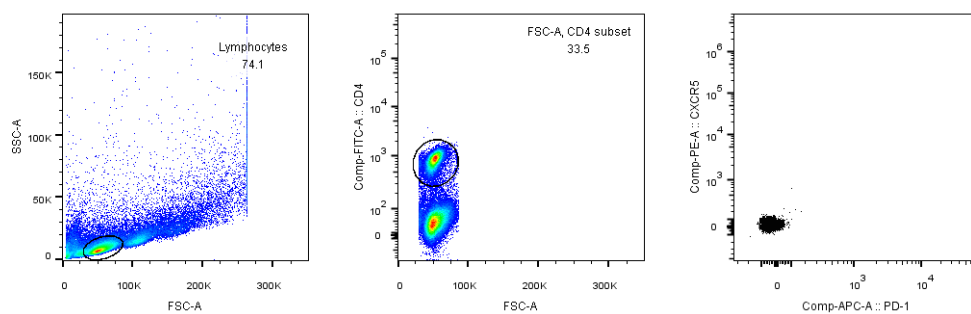

Splenocytes were stained with FITC-CD4, PE-isotype and APC-isotype.

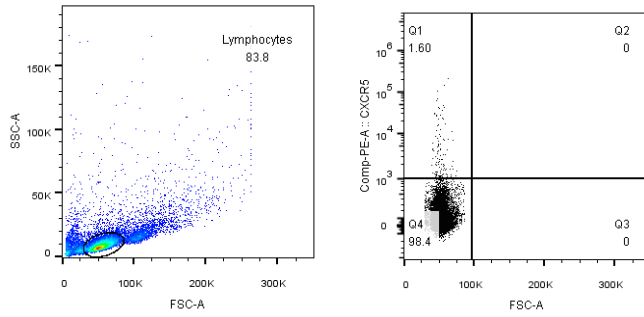

Splenocytes were stained with PE-CXCR5.

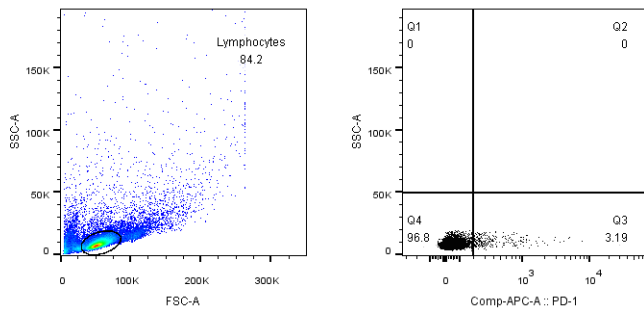

Splenocytes were stained with APC-PD-1.

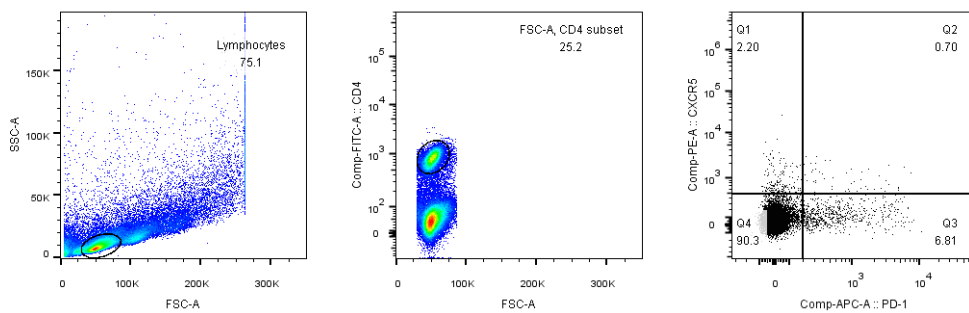

Lymphocytes were firstly gated. Then, CD4<sup>+</sup> T cells were gated on lymphocytes. Finally, PD-1<sup>+</sup>CXCR5<sup>+</sup> cells were gated on CD4<sup>+</sup> T cells.

**Figure S3. Gating on FACS plots.**
